# Supplementary material
Source: Springer Nature journal article supplement (https://www.springermedizin.de/resource/supplementary/12883_2013_1050_MOESM6_ESM.pdf/9456424)
Supplement: MOESM6 [file 9456424]

Supplemental table 6. Proportional odds logistic regression analyses using quartiles of cystatin C and albumin/creatinine in the group with deep or infratentorial CMBs

| Variables                       | N  | unadjusted OR | 95% CI    | <i>p</i> | adjusted OR | 95% CI     | <i>p</i> |
|---------------------------------|----|---------------|-----------|----------|-------------|------------|----------|
| Quartiles of Cystatin C         |    |               |           |          |             |            |          |
| Q4( $\geq 66.7$ )               | 45 | 5.00          | 1.30-1.91 | 0.02     | 7.00        | 1.24-35.46 | 0.03     |
| Q3(54.7-66.7)                   | 39 | 1.50          | 0.51-4.34 | 0.46     | 2.95        | 0.31-2.76  | 0.42     |
| Q2(47.2-54.7)                   | 23 | 1.00          | 0.40-2.28 | 0.93     | 2.81        | 0.52-1.49  | 0.23     |
| Q1( $\leq 47.2$ ), ref          | 28 |               |           |          |             |            |          |
| <i>p</i> for trend              |    |               |           | 0.02     |             |            | 0.02     |
| Quartiles of albumin/creatinine |    |               |           |          |             |            |          |
| Q4( $\geq 0.10$ )               | 41 | 1.40          | 0.39-5.00 | 0.61     | 3.60        | 0.71-28.00 | 0.22     |
| Q3(0.02-.0.10)                  | 41 | 1.00          | 0.26-3.08 | 0.87     | 1.58        | 0.73-1.15  | 0.65     |
| Q2(0.01-0.02)                   | 25 | 1.23          | 0.30-5.03 | 0.77     | 2.00        | 0.20-1.96  | 0.55     |
| Q1( $\leq 0.01$ ),ref           | 28 |               |           |          |             |            |          |
| <i>p</i> for trend              |    |               |           | 0.72     |             |            | 0.26     |

\*adjusted for the covariates:age, sex, total cholesterol, diabetes, hypertension, dyslipidemia, previous heart disease, smoking, previous anti thrombotic or anticoagulant use and white matter lesions
